# Supplementary material for: Impact of a subtropical high and a typhoon on a severe ozone pollution episode in the Pearl River Delta, China
Source: Copernicus journal article supplement (doi:10.5194/acp-2022-290), 2022-05-24
Supplement: Supplementary file [file acp-2022-290-RC2-supplement.pdf]

“Impact of a subtropical high and a typhoon on a severe ozone pollution episode in the Pearl River Delta, China” by Shanshan Ouyang et al. discussed in detail the influence of a subtropical high and a typhoon weather process on severe O<sub>3</sub> pollution in the Pearl River Delta. The manuscript provides valuable information on the formation mechanism of ozone pollution in coastal areas under such weather conditions. There are some minor suggestions before publication.

#### General comments

In Section 3.2, why the correlation between T and RH simulation results is as high as 0.97 and 0.84, while the correlation between WD10 and WS10 simulation results is only 0.69 and 0.64, can you give some explanation?

In Section 3.3, the meteorological factors that are favorable to the development of ozone-polluted weather during the typhoon period and the subtropical high pressure period are the same? so why? Can you compare the two periods separately?

#### Specific comments

In the introduction, please pay attention to the tense.

Line 72: Summary and conclusions are presented in Section 4

Figure 11(b): Please modify the abscissa of Figure 11(b). For example, change 2500 to 25.
